# Supplementary material for: Mapping protein interactions by combining antibody affinity maturation and mass spectrometry
Source: PubMed Central journal article supplement (PMC3171153; doi:10.1016/j.ab.2011.05.005), 2011-10-01

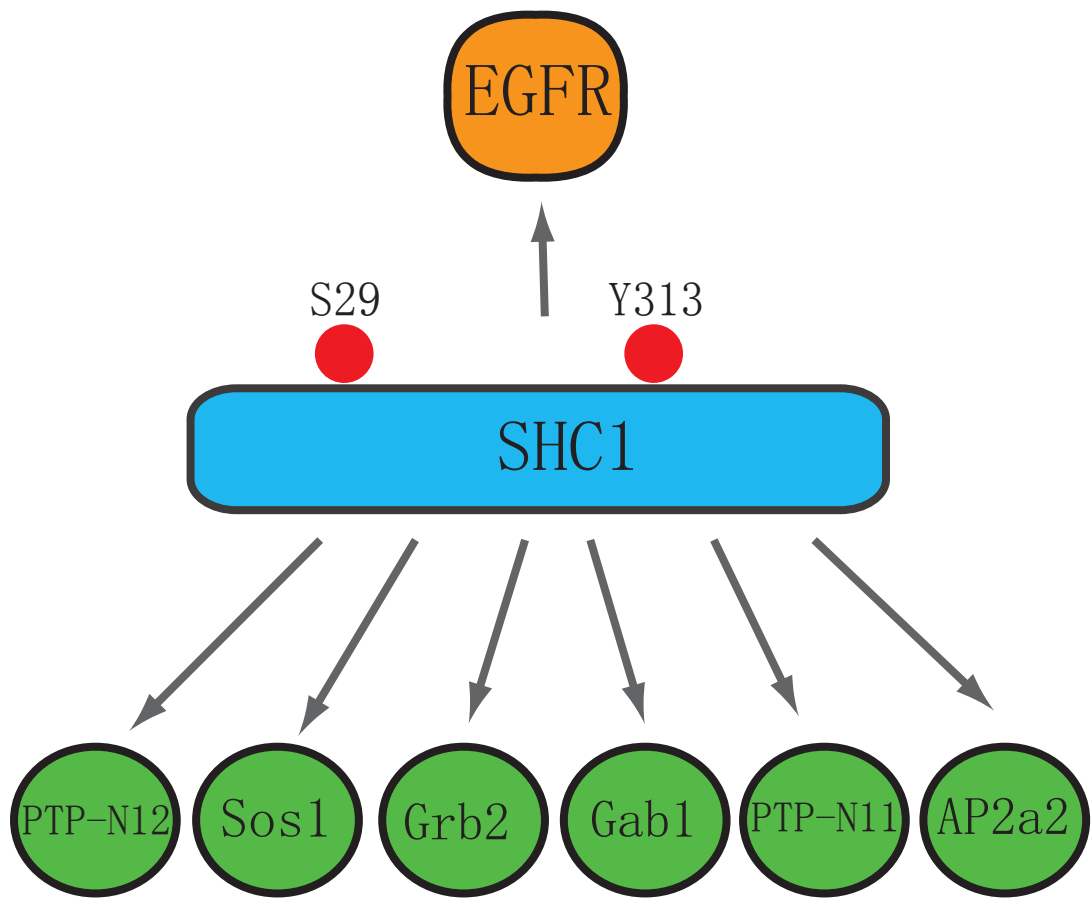

Supplement: mmc3.pdf [file mmc3.pdf]
